# Supplementary material
Source: PubMed Central journal article supplement (PMC8901043)
Supplement: ehp9752.s001.acco.pdf [file ehp9752.s001.acco.pdf]

**Note to readers with disabilities:** *EHP* strives to ensure that all journal content is accessible to all readers. However, some figures and Supplemental Material published in *EHP* articles may not conform to [508 standards](#) due to the complexity of the information being presented. If you need assistance accessing journal content, please contact [ehp508@niehs.nih.gov](mailto:ehp508@niehs.nih.gov). Our staff will work with you to assess and meet your accessibility needs within 3 working days.

### **Supplemental Material**

#### **Deep Ensemble Machine Learning Framework for the Estimation of PM<sub>2.5</sub> Concentrations**

Wenhua Yu, Shanshan Li, Tingting Ye, Rongbin Xu, Jiangning Song, and Yuming Guo

#### **Table of Contents**

**Table S1.** The model hyper-parameters and computing cost information for study models.

**Table S2.** The variables information and sources.

**Table S3.** The seasonal distribution of daily average PM<sub>2.5</sub> ( $\mu\text{g}/\text{m}^3$ ) from 2015 to 2019 in Italy.

**Table S4.** The distribution comparison between observed PM<sub>2.5</sub> concentration and estimated PM<sub>2.5</sub> by RF, XGBoost, SL, and DEML in Italy from 2015 to 2019.

**Figure S1.** R<sup>2</sup> for each monitoring station based on predicted and observed PM<sub>2.5</sub> from 2015 to 2019 in Italy.

**Figure S2.** Italian regional distribution in Cluster-based spatial Cross-validation.

**Figure S3.** The dissimilarity index (DI) of the spatial locations in Italy with the ground stations in a specific day.

**Figure S4.** PM<sub>2.5</sub> imputation performance of the RF, XGBoost, and DEML by PM<sub>10</sub> from 2015 to 2019 in Italy.

**Figure S5.** The evaluation of the importance of the explanatory variables in PM<sub>2.5</sub> estimation by RF and XGboost from 2015 to 2019 in Italy.

**Table S1.** The model hyper-parameters and computing cost information for study models

| <b>Model</b> | <b>Main Hyper-parameters</b>                                                                    | <b>R package</b> | <b>Time cost for 10,000 cases</b> |
|--------------|-------------------------------------------------------------------------------------------------|------------------|-----------------------------------|
| GLM          | alpha = 1, nlambda = 100                                                                        | glmnet           | 44.1 secs                         |
| GBM          | n.trees = 100, interaction.depth = 1, n.minobsinnode = 10, shrinkage = 0.1, bag.fraction = 0.5, | gbm              | 14.15 mins                        |
| SVM          | gamma = 0.1, tolerance=0.001, epsilon =0.1                                                      | e1071            | 2.97 mins                         |
| RF           | mtry=4, num.trees = 500                                                                         | ranger           | 30.4 secs                         |
| XGBoost      | ntrees = 1000, max_depth = 4, shrinkage = 0.1, minobspnode = 10                                 | XGBoost          | 5.00 mins                         |
| SL           | The same as GBM, SVM, RF, and XGBoost                                                           | SuperLearner     | 6.35 mins                         |
| DEML         | The same as GLM, GBM, SVM, RF, and XGBoost                                                      | deeper           | 11.98 mins                        |

Note: SVM: support vector machine; RF: Random Forest; XGBoost: extreme gradient boosting; GBM: gradient boosting Machine; Date Fusion GLM: the generalized linear regression model with the data fusion method; SL: Super Learner algorithm; DEML: the three-stage stacked deep ensemble framework method. The CPU time cost was calculated using Intel(R) Core(TM) i7-1165G7 @ 2.80GHz with 4 physical cores paralleling computing.

**Table S2.** The variables information and sources

| Variable type        | Variable name                                  | unit              | Resolution                                  | Variable Resources                                                                                                                                                                                                          |
|----------------------|------------------------------------------------|-------------------|---------------------------------------------|-----------------------------------------------------------------------------------------------------------------------------------------------------------------------------------------------------------------------------|
| Response variable    | PM <sub>2.5</sub>                              | ug/m <sup>3</sup> | -                                           | the Italian National Institute for Environmental Protection and Research (ISPRA) ( <a href="https://www.isprambiente.gov.it/en/databases">https://www.isprambiente.gov.it/en/databases</a> )                                |
| independent variable | PM <sub>10</sub>                               | ug/m <sup>3</sup> | -                                           | the Italian National Institute for Environmental Protection and Research (ISPRA) ( <a href="https://www.isprambiente.gov.it/en/databases">https://www.isprambiente.gov.it/en/databases</a> )                                |
| Position             | longitude                                      |                   | -                                           | the Italian National Institute for Environmental Protection and Research (ISPRA) ( <a href="https://www.isprambiente.gov.it/en/databases">https://www.isprambiente.gov.it/en/databases</a> )                                |
| Position             | latitude                                       |                   | -                                           | the Italian National Institute for Environmental Protection and Research (ISPRA) ( <a href="https://www.isprambiente.gov.it/en/databases">https://www.isprambiente.gov.it/en/databases</a> )                                |
| Climate              | dewpoint Temperature                           | K                 | hourly data from 2015-2019,Italy, 0.1 x 0.1 | GEE ERA5-land- ECMWF climate reanalysis <a href="https://developers.google.com/earth-engine/datasets/catalog/ECMWF_ERA5_LAND_HOURLY">https://developers.google.com/earth-engine/datasets/catalog/ECMWF_ERA5_LAND_HOURLY</a> |
| Climate              | daily average Temperature                      | K                 | hourly data from 2015-2019,Italy, 0.1 x 0.1 | GEE ERA5-land- ECMWF climate reanalysis <a href="https://developers.google.com/earth-engine/datasets/catalog/ECMWF_ERA5_LAND_HOURLY">https://developers.google.com/earth-engine/datasets/catalog/ECMWF_ERA5_LAND_HOURLY</a> |
| Climate              | daily maximum Temperature                      | K                 | hourly data from 2015-2019,Italy, 0.1 x 0.1 | GEE ERA5-land- ECMWF climate reanalysis <a href="https://developers.google.com/earth-engine/datasets/catalog/ECMWF_ERA5_LAND_HOURLY">https://developers.google.com/earth-engine/datasets/catalog/ECMWF_ERA5_LAND_HOURLY</a> |
| Climate              | daily minimum Temperature                      | K                 | hourly data from 2015-2019,Italy, 0.1 x 0.1 | GEE ERA5-land- ECMWF climate reanalysis <a href="https://developers.google.com/earth-engine/datasets/catalog/ECMWF_ERA5_LAND_HOURLY">https://developers.google.com/earth-engine/datasets/catalog/ECMWF_ERA5_LAND_HOURLY</a> |
| Climate              | Relative humidity                              | %                 | hourly data from 2015-2019,Italy, 0.1 x 0.1 | Calculated through 'humidity' R package                                                                                                                                                                                     |
| Climate              | Total Evaporation                              | mm                | hourly data from 2015-2019,Italy, 0.1 x 0.1 | GEE ERA5-land- ECMWF climate reanalysis <a href="https://developers.google.com/earth-engine/datasets/catalog/ECMWF_ERA5_LAND_HOURLY">https://developers.google.com/earth-engine/datasets/catalog/ECMWF_ERA5_LAND_HOURLY</a> |
| Climate              | U-wind(east-west component of the wind) at 10m | m/s               | hourly data from 2015-2019,Italy, 0.1 x 0.1 | GEE ERA5-land- ECMWF climate reanalysis <a href="https://developers.google.com/earth-engine/datasets/catalog/ECMWF_ERA5_LAND_HOURLY">https://developers.google.com/earth-engine/datasets/catalog/ECMWF_ERA5_LAND_HOURLY</a> |
| Climate              | V-wind(north-south component                   | m/s               | hourly data from 2015-2019,Italy, 0.1 x 0.1 | GEE ERA5-land- ECMWF climate reanalysis <a href="https://developers.google.com/earth-engine/datasets/catalog/ECMWF_ERA5_LAND_HOURLY">https://developers.google.com/earth-engine/datasets/catalog/ECMWF_ERA5_LAND_HOURLY</a> |

|                    |                          |    |                                              |                                                                                                                                                                                                                                                                                                |
|--------------------|--------------------------|----|----------------------------------------------|------------------------------------------------------------------------------------------------------------------------------------------------------------------------------------------------------------------------------------------------------------------------------------------------|
|                    | of the wind) at 10m      |    |                                              |                                                                                                                                                                                                                                                                                                |
| Climate            | Surface Pressure         | Pa | hourly data from 2015-2019, Italy, 0.1 x 0.1 | GEE ERA5-land- ECMWF climate reanalysis <a href="https://developers.google.com/earth-engine/datasets/catalog/ECMWF_ERA5_LAND_HOURLY">https://developers.google.com/earth-engine/datasets/catalog/ECMWF_ERA5_LAND_HOURLY</a>                                                                    |
| Climate            | solar radiation          | J  | hourly data from 2015-2019, Italy, 0.1 x 0.1 | GEE ERA5-land- ECMWF climate reanalysis <a href="https://developers.google.com/earth-engine/datasets/catalog/ECMWF_ERA5_LAND_HOURLY">https://developers.google.com/earth-engine/datasets/catalog/ECMWF_ERA5_LAND_HOURLY</a>                                                                    |
| Climate            | Total Precipitation      | m  | hourly data from 2015-2019, Italy, 0.1 x 0.1 | GEE ERA5-land- ECMWF climate reanalysis <a href="https://developers.google.com/earth-engine/datasets/catalog/ECMWF_ERA5_LAND_HOURLY">https://developers.google.com/earth-engine/datasets/catalog/ECMWF_ERA5_LAND_HOURLY</a>                                                                    |
| land use           | landcover classification |    | yearly from 2015-2019, Italy, 100 meters     | GEE Copernicus Global Land Cover Layers: CGLS-LC100 collection 3 <a href="https://developers.google.com/earth-engine/datasets/catalog/COPERNICUS_Landcover_100m_Proba-V-C3_Global">https://developers.google.com/earth-engine/datasets/catalog/COPERNICUS_Landcover_100m_Proba-V-C3_Global</a> |
| elevation          | elevation                | m  | 90 meters                                    | GEE SRTM Digital Elevation Data Version 4 the Shuttle Radar Topography Mission (SRTM) project <a href="https://srtm.csi.cgiar.org">https://srtm.csi.cgiar.org</a>                                                                                                                              |
| populaiton density | population density       |    | yearly from 2015-2019, Italy, 100 meters     | GEE WorldPop Global Project Population Data: Estimated Residential Population per 100x100m Grid Square <a href="https://www.worldpop.org/">https://www.worldpop.org/</a>                                                                                                                       |
| satellite          | AOD 470nm                |    | daily data from 2015-2019, Italy, 1km        | GEE MCD19A2.006: Terra & Aqua MAIAC Land Aerosol Optical Depth Daily 1km <a href="https://developers.google.com/earth-engine/datasets/catalog/MODIS_006_MCD19A2_GRANULES#bands">https://developers.google.com/earth-engine/datasets/catalog/MODIS_006_MCD19A2_GRANULES#bands</a>               |

**Table S3.** The seasonal distribution of daily average PM<sub>2.5</sub> (µg/m<sup>3</sup>) from 2015 to 2019 in Italy

| Season | Mean  | SD    | Median | IQR   |
|--------|-------|-------|--------|-------|
| Spring | 16.83 | 10.66 | 14.00  | 12.49 |
| Summer | 14.16 | 6.67  | 13.05  | 8.10  |
| Autumn | 19.27 | 13.49 | 15.90  | 14.86 |
| Winter | 32.10 | 18.86 | 29.22  | 26.22 |

Note: PM<sub>2.5</sub>: particles with a diameter of < 2.5 µm; SD: Standard deviation; IQR: The Interquartile Range by using the 75<sup>th</sup> minus 25<sup>th</sup> percentile of PM<sub>2.5</sub> concentrations in the study period. Spring: from March to May; Summer: from June to August; Autumn: from September to November; Winter: from December to February.

**Table S4.** The distribution comparison between observed PM<sub>2.5</sub> concentration and estimated PM<sub>2.5</sub> by RF, XGBoost, SL, and DEML in Italy from 2015 to 2019

|                             |         | Mean  | SD    | Min  | Q1    | Q2    | Q3    | Q4    | Cor  |
|-----------------------------|---------|-------|-------|------|-------|-------|-------|-------|------|
| Observed PM <sub>2.5</sub>  |         | 20.33 | 14.70 | 1.20 | 10.08 | 15.90 | 25.89 | 98.11 | NA   |
|                             | RF      | 20.43 | 12.24 | 1.60 | 11.89 | 16.53 | 25.39 | 86.02 | 0.89 |
| Estimated PM <sub>2.5</sub> | XGBoost | 20.38 | 11.21 | 0.27 | 12.44 | 17.31 | 25.53 | 79.83 | 0.81 |
|                             | SL      | 20.44 | 11.80 | 1.73 | 12.14 | 16.77 | 25.43 | 84.35 | 0.89 |
|                             | DEML    | 20.34 | 13.56 | 0.65 | 11.11 | 16.06 | 25.33 | 92.10 | 0.91 |

Note: PM<sub>2.5</sub>: particles with a diameter of < 2.5 µm; SD: Standard deviation; Q1-Q4: The 25<sup>th</sup>, 50<sup>th</sup>, 75<sup>th</sup>, and 100<sup>th</sup> percentile of PM<sub>2.5</sub> concentrations in the study period. RF: Random Forest; XGBoost: extreme gradient boosting; SL: Super Learner method; DEML: the three-stage stacked deep ensemble framework method; Cor: the Spearman's rank correlation coefficient.

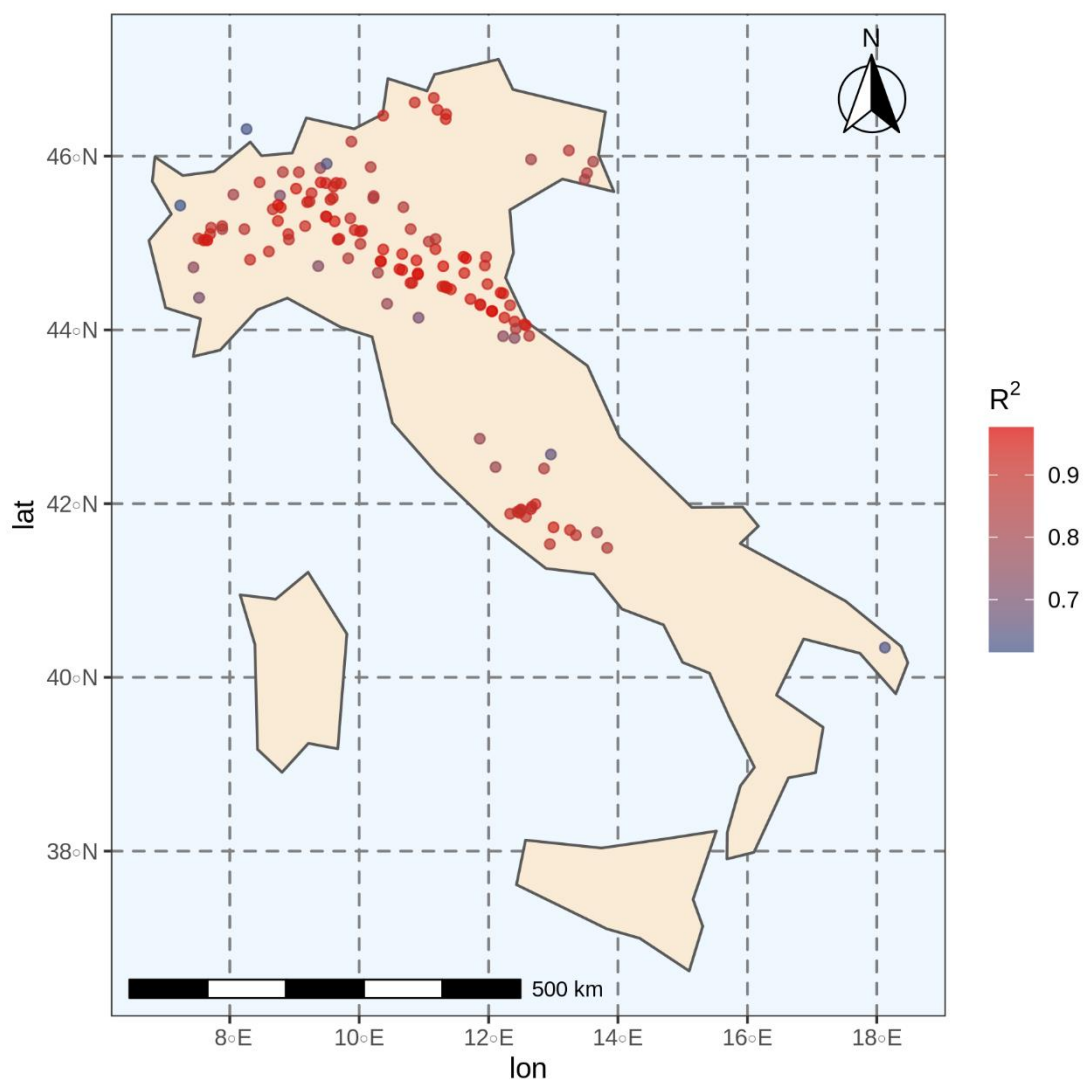

**Figure S1.**  $R^2$  for each monitoring station based on predicted and observed  $PM_{2.5}$  from 2015 to 2019 in Italy

Note:  $R^2$  is the R-squared for 10-fold cross-validation. The points denote the position of monitor stations.

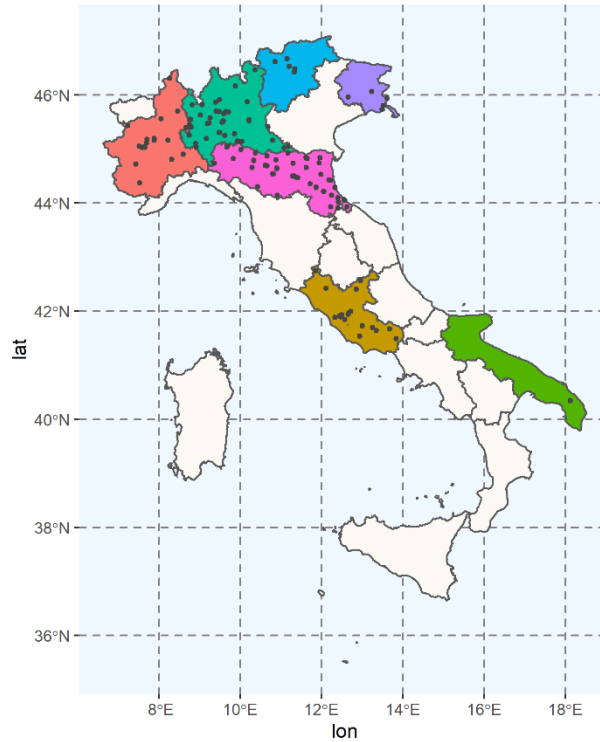

**Figure S2.** Italian regional distribution in Cluster-based spatial Cross-validation

Note: 7 out of 20 Italian regions were involved in the cluster-based spatial Cross-validation analysis. Dark points denote the position of monitor stations.

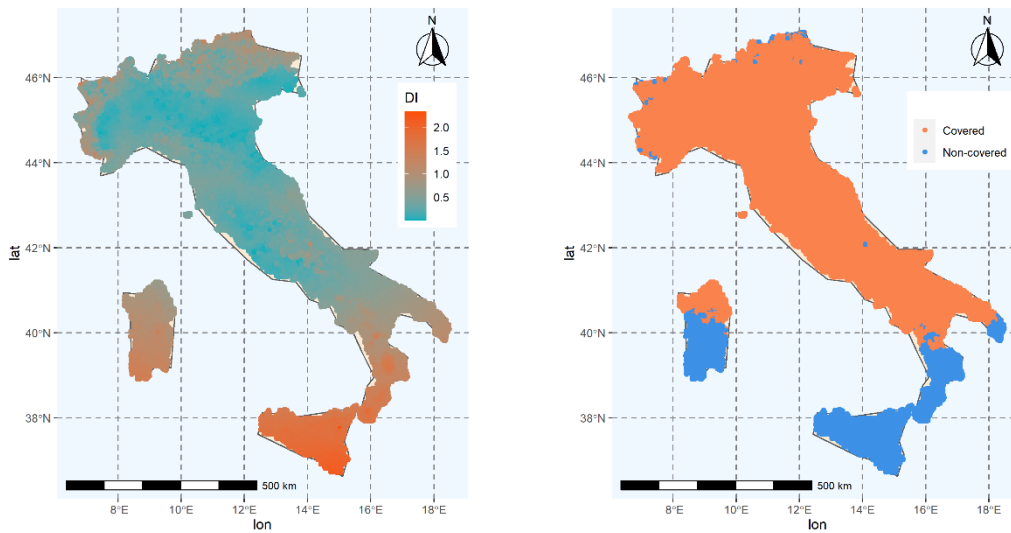

**Figure S3.** The dissimilarity index (DI) of the spatial locations in Italy with the ground stations in a specific day

Note: The dissimilarity index (left) is the normalized and weighted minimum distance to the nearest training data point divided by the average distance within the training data; The dissimilarity and uncertain area (right): the covered area is the region where the DI value is lower than 1, which means the spatial difference to the nearest station point is smaller than the

average dissimilarity of all station data. The variable importance was calculated by the RF as the variables' weights; We randomly selected a specific day on 2015-07-15. RF: Random Forest.

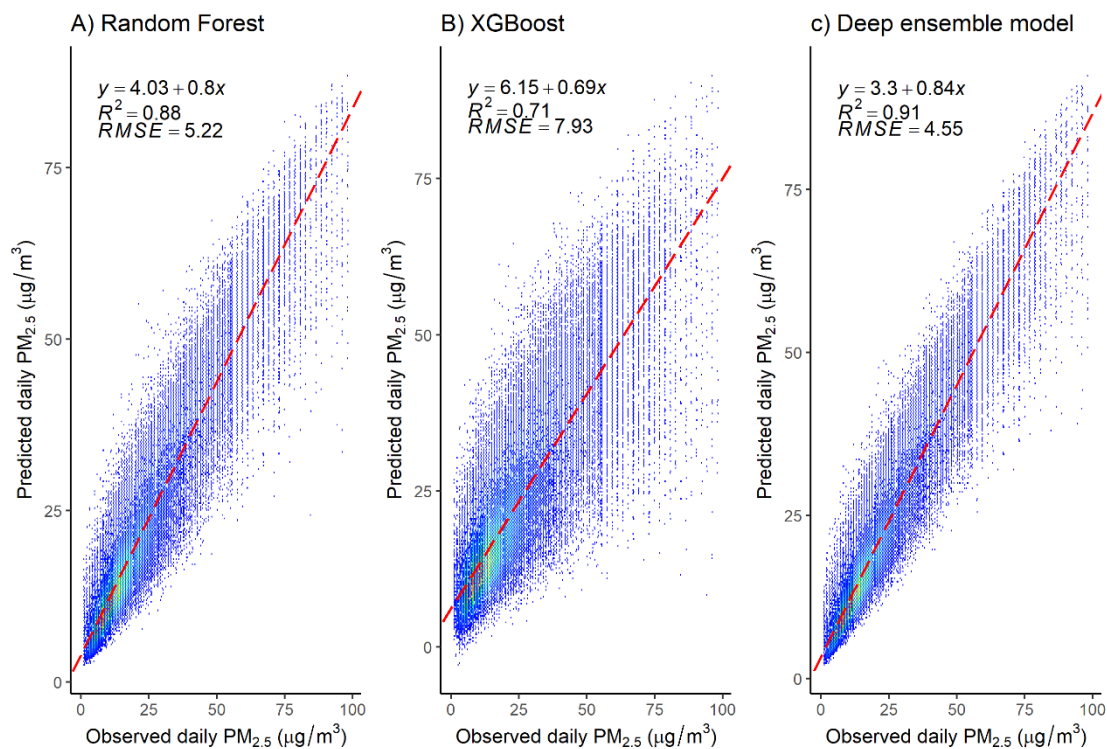

**Figure S4.** PM<sub>2.5</sub> imputation performance of the RF, XGBoost, and DEML by PM<sub>10</sub> from 2015 to 2019 in Italy

Note: PM<sub>2.5</sub>: particles with a diameter of  $< 2.5 \mu\text{m}$ ; PM<sub>10</sub>: particles with a diameter of  $< 10 \mu\text{m}$ ;  $R^2$  is the R-squared for 10-fold cross-validation; RMSE: the root-mean-square error ( $\mu\text{g}/\text{m}^3$ ); RF: Random Forest; XGBoost: extreme gradient boosting. DEML: the three-stage stacked deep ensemble framework method.



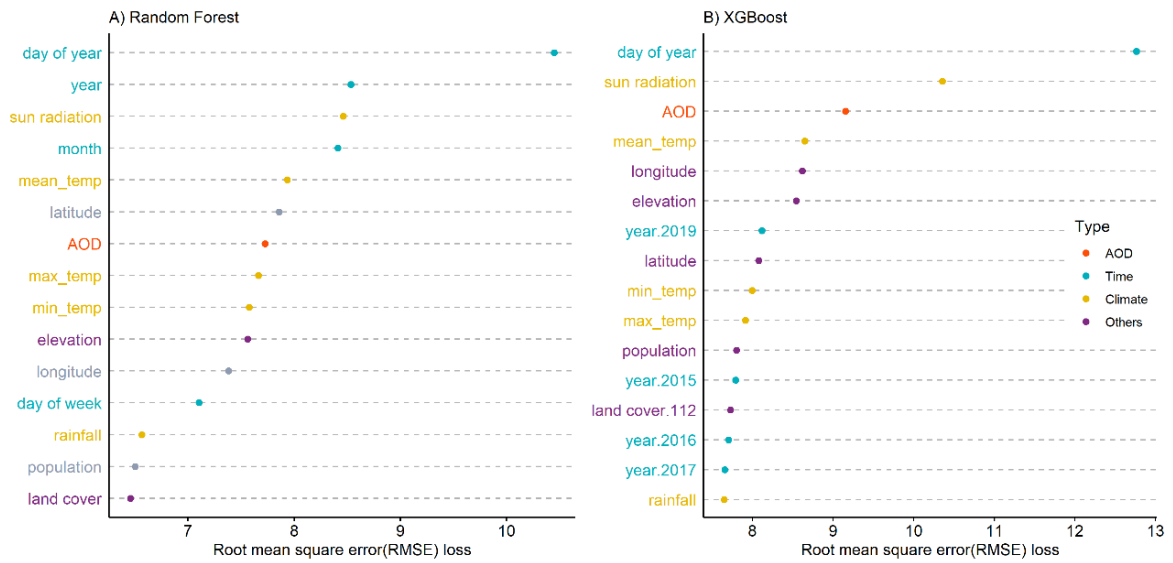

**Figure S5.** The evaluation of the importance of the explanatory variables in PM<sub>2.5</sub> estimation by RF and XGBoost from 2015 to 2019 in Italy

Note: The loss of root mean square error was calculated to measure how much a model's performance change if the effect of a selected explanatory variable is removed. 10 permutations were selected to repeat the process 10 times to compute the mean values of RMSE loss. The RF and XGBoost models were used to calculate the variable importance. RF: Random Forest; XGBoost: extreme gradient boosting. The legend indicate the type of variables: Time included day of year, month, year, and day of week; climate included mean/max/min daily temperature, sun radiation, and rainfall; Others included longitude, latitude, elevation, land cover, and population density. PM<sub>2.5</sub>: particles with a diameter of < 2.5  $\mu\text{m}$ .
